# Supplementary material for: Prognostic Value of Neutrophil-to-Lymphocyte Ratio in Patients with Acute Decompensated Heart Failure: A Meta-Analysis
Source: MDPI journal article supplement (doi:10.3390/jcm13051212), 2024-02-21
Supplement: s1 [file s1]

**Supplementary Table 1:** Newcastle-Ottawa scale for quality assessment and bias assessment of the included studies

**Supplementary Table 2:** Covariates Used for Adjustment in Short-Term and Long-Term Mortality

**Supplementary Table 3:** Certainty of evidence

**Supplementary Figure 1:** The Preferred Reporting Items for Systematic Reviews and Meta-Analyses (PRISMA) flow diagram

**Supplementary Figure 2** Sensitivity analysis for in-hospital mortality (based on high vs low NLR)

**Supplementary Figure 3** Funnel plot for in-hospital mortality (based on high vs low NLR)

**Supplementary Figure 4** Funnel plot for in-hospital mortality (based on high vs low NLR) after trim-and-fill method

**Supplementary Figure 5** Sensitivity analysis for in-hospital mortality based on highest vs lowest NLR quartiles

**Supplementary Figure 6** Funnel plot for mean differences in NLR between non-survivors and survivors during index hospitalization

**Supplementary Table 1:** Newcastle-Ottawa scale for quality assessment and bias assessment of the included studies

| Study                        | Selection                                |                                     |                           |                                                                          | Comparability                                                   | Exposure              |                                                   |                                  | Total | AHRQ standards |
|------------------------------|------------------------------------------|-------------------------------------|---------------------------|--------------------------------------------------------------------------|-----------------------------------------------------------------|-----------------------|---------------------------------------------------|----------------------------------|-------|----------------|
|                              | Representativeness of the exposed cohort | Selection of the non exposed cohort | Ascertainment of exposure | Demonstration that outcome of interest was not present at start of study | Comparability of cohorts on the basis of the design or analysis | Assessment of outcome | Was followed-up long enough for outcomes to occur | Adequacy of follow up of cohorts |       |                |
| Turfan et al 2014 [16]       | ★                                        | ★                                   | ★                         | ★                                                                        | 0                                                               | ★                     | ★                                                 | ★                                | 7     | poor           |
| Angkananard et al 2021 [17]  | ★                                        | ★                                   | ★                         | ★                                                                        | ★                                                               | ★                     | ★                                                 | ★                                | 8     | fair           |
| Pourafkari et al 2018 [18]   | ★                                        | ★                                   | ★                         | ★                                                                        | 0                                                               | ★                     | ★                                                 | ★                                | 7     | poor           |
| Turcato et al 2019 [19]      | ★                                        | ★                                   | ★                         | ★                                                                        | ★★                                                              | ★                     | ★                                                 | ★                                | 9     | good           |
| Huang et al 2017 [20]        | ★                                        | ★                                   | ★                         | ★                                                                        | 0                                                               | ★                     | ★                                                 | ★                                | 7     | poor           |
| Zhu et al 2022 [21]          | ★                                        | ★                                   | ★                         | ★                                                                        | ★★                                                              | ★                     | ★                                                 | ★                                | 9     | good           |
| Ostrowska et al 2017 [22]    | ★                                        | ★                                   | ★                         | ★                                                                        | 0                                                               | ★                     | ★                                                 | ★                                | 7     | poor           |
| Sadeghi et al 2020 [23]      | ★                                        | ★                                   | ★                         | ★                                                                        | 0                                                               | ★                     | ★                                                 | ★                                | 7     | poor           |
| Tasal et al 2014 [24]        | ★                                        | ★                                   | ★                         | ★                                                                        | 0                                                               | ★                     | ★                                                 | ★                                | 7     | poor           |
| Cho et al 2020 [25]          | ★                                        | ★                                   | ★                         | ★                                                                        | ★★                                                              | ★                     | ★                                                 | ★                                | 9     | good           |
| Uthamalingam et al 2011 [26] | ★                                        | ★                                   | ★                         | ★                                                                        | ★★                                                              | ★                     | ★                                                 | ★                                | 9     | good           |
| Curran et al 2021 (GoDARTS)  | ★                                        | ★                                   | ★                         | ★                                                                        | ★★                                                              | ★                     | ★                                                 | ★                                | 9     | good           |

|                           |   |   |   |   |    |   |   |   |   |      |
|---------------------------|---|---|---|---|----|---|---|---|---|------|
| ) [11]                    |   |   |   |   |    |   |   |   |   |      |
| Liu et al<br>2023 [12]    | ★ | ★ | ★ | ★ | ★★ | ★ | ★ | ★ | 9 | good |
| Durmus et<br>al 2015 [27] | ★ | ★ | ★ | ★ | ★★ | ★ | ★ | ★ | 9 | good |
| Tamaki et<br>al 2023 [28] | ★ | ★ | ★ | ★ | ★★ | ★ | ★ | ★ | 9 | good |

**Supplementary Table 2:** Covariates Used for Adjustment in Short-Term and Long-Term Mortality

| Study                       | Covariates used for adjustment in short-term mortality                                                                                                                                                                                                                                                                                                                                                                                                                                                                                                                             | Covariates used for adjustment in long-term mortality                                                                                                                                                                                                                                                                                                                                                                                                                                                                                                                                              |
|-----------------------------|------------------------------------------------------------------------------------------------------------------------------------------------------------------------------------------------------------------------------------------------------------------------------------------------------------------------------------------------------------------------------------------------------------------------------------------------------------------------------------------------------------------------------------------------------------------------------------|----------------------------------------------------------------------------------------------------------------------------------------------------------------------------------------------------------------------------------------------------------------------------------------------------------------------------------------------------------------------------------------------------------------------------------------------------------------------------------------------------------------------------------------------------------------------------------------------------|
| Turfan et al 2014 [16]      | -                                                                                                                                                                                                                                                                                                                                                                                                                                                                                                                                                                                  | -                                                                                                                                                                                                                                                                                                                                                                                                                                                                                                                                                                                                  |
| Angkananard et al 2021 [17] | NYHA classification, initial systolic blood pressure, and initial respiratory rate                                                                                                                                                                                                                                                                                                                                                                                                                                                                                                 |                                                                                                                                                                                                                                                                                                                                                                                                                                                                                                                                                                                                    |
| Pourafkari et al 2018 [18]  | -                                                                                                                                                                                                                                                                                                                                                                                                                                                                                                                                                                                  | -                                                                                                                                                                                                                                                                                                                                                                                                                                                                                                                                                                                                  |
| Turcato et al 2019 [19]     | Age, NYHA class, echocardiography parameters, history of ischemic heart disease, atrial fibrillation, diabetes, and for the values of hemoglobin, creatinine and WBC count                                                                                                                                                                                                                                                                                                                                                                                                         |                                                                                                                                                                                                                                                                                                                                                                                                                                                                                                                                                                                                    |
| Huang et al 2017 [20]       | -                                                                                                                                                                                                                                                                                                                                                                                                                                                                                                                                                                                  | -                                                                                                                                                                                                                                                                                                                                                                                                                                                                                                                                                                                                  |
| Zhu et al 2022 [21]         |                                                                                                                                                                                                                                                                                                                                                                                                                                                                                                                                                                                    | Age, sex, MAP, BUN and Log2 NT-proBNP                                                                                                                                                                                                                                                                                                                                                                                                                                                                                                                                                              |
| Ostrowska et al 2017 [22]   | -                                                                                                                                                                                                                                                                                                                                                                                                                                                                                                                                                                                  | -                                                                                                                                                                                                                                                                                                                                                                                                                                                                                                                                                                                                  |
| Sadeghi et al 2020 [23]     | -                                                                                                                                                                                                                                                                                                                                                                                                                                                                                                                                                                                  | -                                                                                                                                                                                                                                                                                                                                                                                                                                                                                                                                                                                                  |
| Tasal et al 2014 [24]       | -                                                                                                                                                                                                                                                                                                                                                                                                                                                                                                                                                                                  | -                                                                                                                                                                                                                                                                                                                                                                                                                                                                                                                                                                                                  |
| Cho et al 2020 [25]         | Age category (70> vs. 70≤), sex (male vs. female), body mass index category (25> vs. 23≤), etiology of heart failure (ischemic vs. non-ischemic), systolic blood pressure (100> vs. 100≤), history of hypertension, history of diabetes mellitus, history of cerebrovascular disease, history of chronic obstructive disease, prior admission history due to HF, presented tachyarrhythmia on admission, sodium level (135> vs. 135≤), creatinine level (2.0> vs. 2.0≤), left ventricular ejection fraction (HFrEF vs HFmrEF vs HFpEF), BNP ≥ 500 pg/mL or NT-proBNP ≥ 1 500 pg/mL | Age category (70> vs. 70≤), sex (male vs. female), body mass index category (23> vs. 23≤), etiology of heart failure (ischemic vs. non-ischemic), systolic blood pressure (100> vs. 100≤), history of hypertension, history of diabetes mellitus, history of cerebrovascular disease, history of chronic obstructive disease, prior admission history due to HF, presented tachyarrhythmia on admission, sodium level (135> vs. 135≤), creatinine level (2.0> vs. 2.0≤), left ventricular ejection fraction (HFrEF vs. HFmrEF vs. HFpEF), BNP ≥ 500 pg/mL or NT-proBNP ≥ 1500 pg/mL, AA, BB, RASi. |

|                                  |   |                                                                                                                                                                                                                                                                |
|----------------------------------|---|----------------------------------------------------------------------------------------------------------------------------------------------------------------------------------------------------------------------------------------------------------------|
| Uthamalingam et al 2011 [26]     | - | Age, gender, cardiac risk factors, the LVEF, medications, hemoglobin, blood urea nitrogen, creatinine, B-type natriuretic peptide, and atrial fibrillation                                                                                                     |
| Curran et al 2021 (GoDARTS) [11] | - | Age, HF hospitalization in the previous year, peripheral oedema, systolic blood pressure, estimated glomerular filtration rate, urea, N-terminal pro-brain natriuretic peptide, haemoglobin, high-density lipoprotein cholesterol, sodium and beta-blocker use |
| Liu et al 2023 [12]              | - | Age, SBP, DBP, HR, RH, AF, AMI, respiratory failure, VF, platelet, BUN, creatinine, glucose, NT-proBNP, diuretics, vasopressin, length of ICU stay, SOFA score, SAPS II                                                                                        |
| Durmus et al 2015 [27]           | - | Age, sex, EF, PLR                                                                                                                                                                                                                                              |
| Tamaki et al 2023 [28]           | - | Age, sex, hypertension, diabetes, coronary artery disease, hemoglobin, estimated glomerular filtration rate, and N-terminal pro-B-type natriuretic peptide level.                                                                                              |

**Supplementary Table 3:** Certainty of evidence

| No of studies                                                                   | Design                | Risk of bias | Inconsistency | Indirectness | Imprecision | Other | Certainty (overall score) |
|---------------------------------------------------------------------------------|-----------------------|--------------|---------------|--------------|-------------|-------|---------------------------|
| <b>Outcome: Mortality (High vs Low NLR)</b>                                     |                       |              |               |              |             |       |                           |
| 8                                                                               | Observational studies | not serious  | serious       | not serious  | serious     | none  | ⊕ ⊕ ⊕ ⊕<br>very low       |
| <b>Outcome: Mortality (Highest tertile quartile vs lowest tertile/quartile)</b> |                       |              |               |              |             |       |                           |
| 4                                                                               | Observational studies | not serious  | serious       | not serious  | serious     | none  | ⊕ ⊕ ⊕ ⊕<br>very low       |
| <b>Outcome: NLR mean difference</b>                                             |                       |              |               |              |             |       |                           |
| 8                                                                               | Observational studies | not serious  | serious       | not serious  | serious     | none  | ⊕ ⊕ ⊕ ⊕<br>very low       |

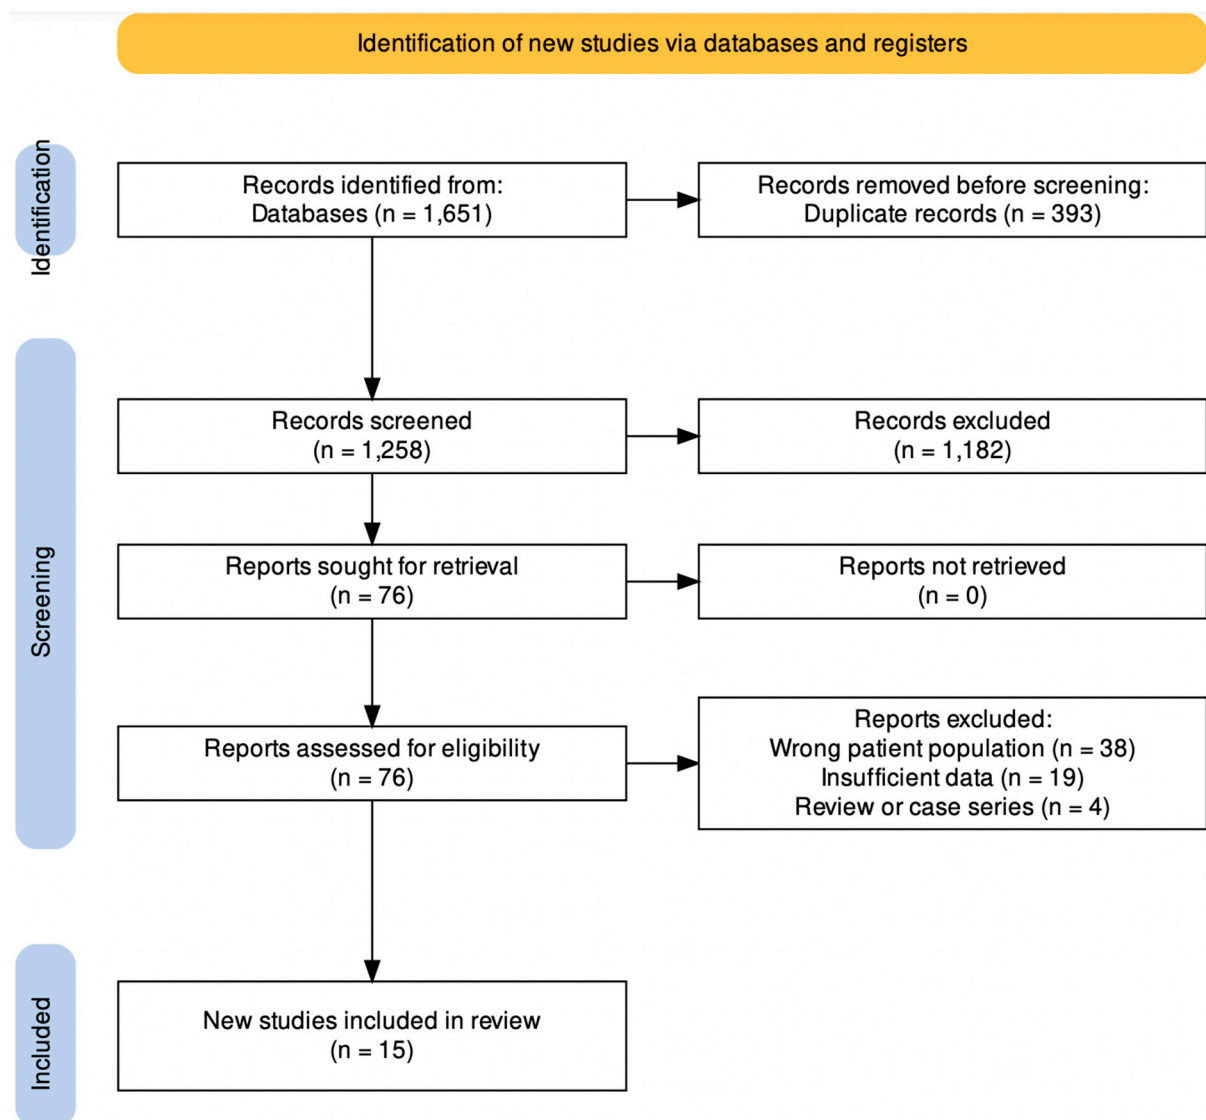

**Supplementary Figure 1:** The Preferred Reporting Items for Systematic Reviews and Meta-Analyses (PRISMA) flow diagram



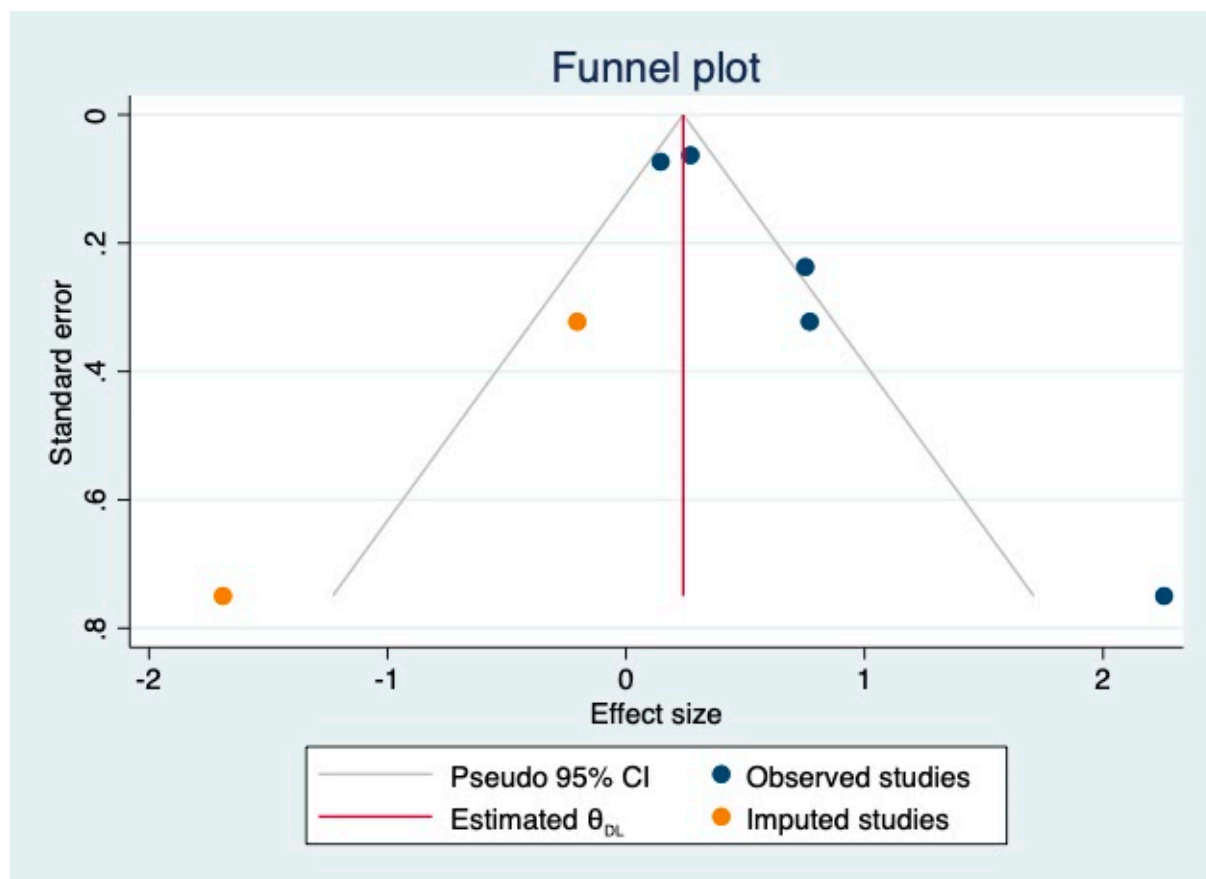

**Supplementary Figure 4** Funnel plot for in-hospital mortality (based on high vs low NLR) after trim-and-fill method

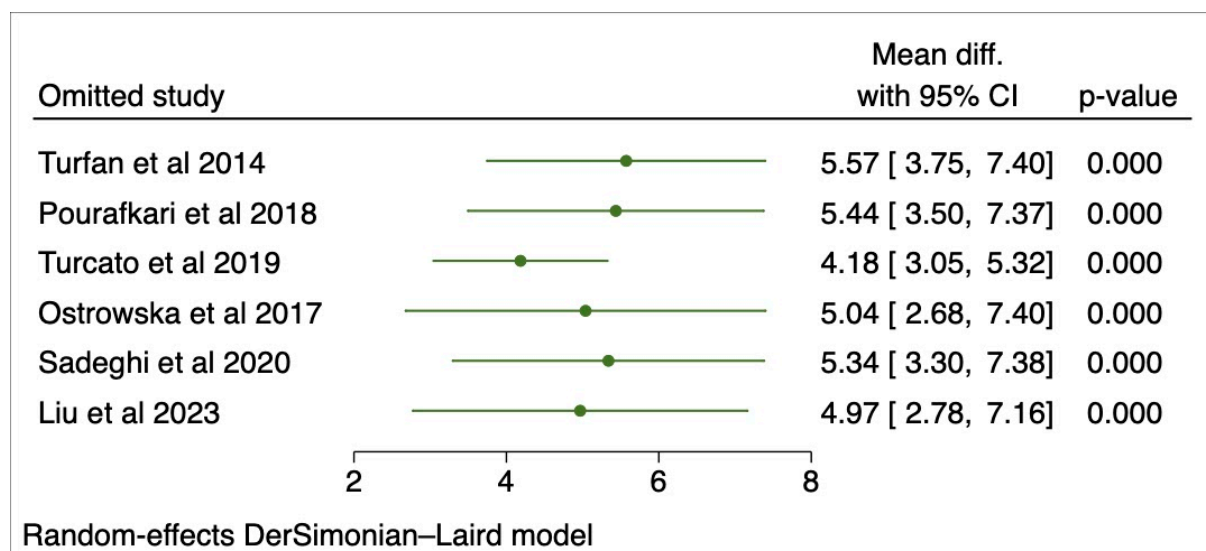

**Supplementary Figure 5** Sensitivity analysis for mean differences in NLR between non-survivors and survivors during index hospitalization



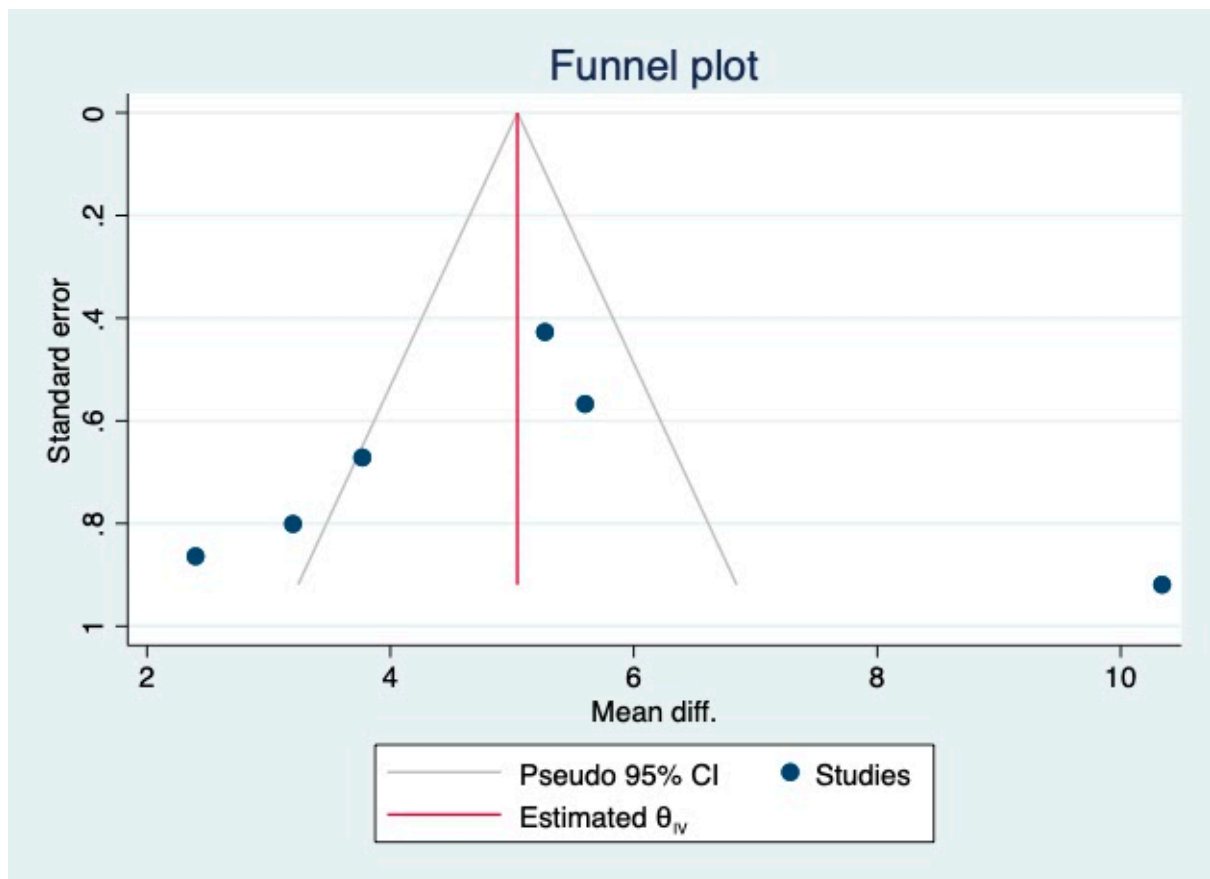

**Supplementary Figure 6** Funnel plot for mean differences in NLR between non-survivors and survivors during index hospitalization
